# Supplementary material
Source: Springer Nature journal article supplement (https://www.springermedizin.de/resource/supplementary/12985_2011_2206_MOESM6_ESM.pdf/9606292)

**(a)****CXCL16 VALUE IN RESPONSE TO PEG-INTRON**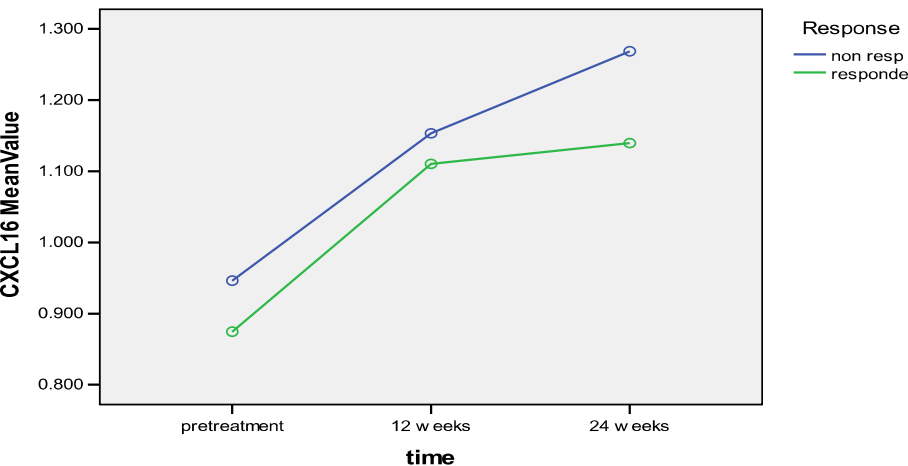**(b)****CXCL16 VALUE IN RESPONSE TO PEGASYS**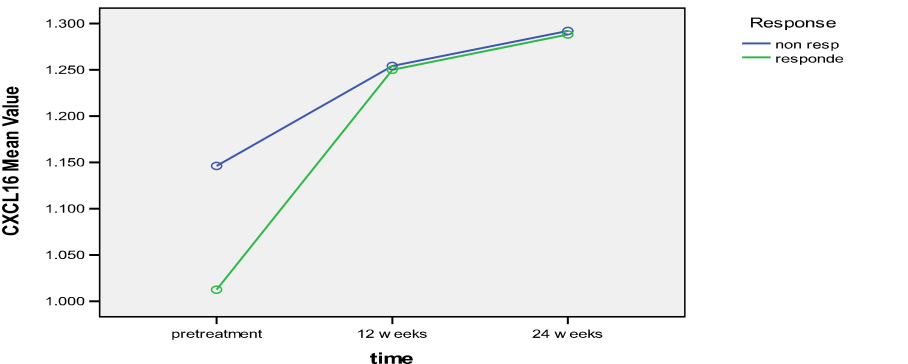

Supplement: MOESM6 [file 9606292]
